# Supplementary material
Source: PubMed Central journal article supplement (PMC2234157)

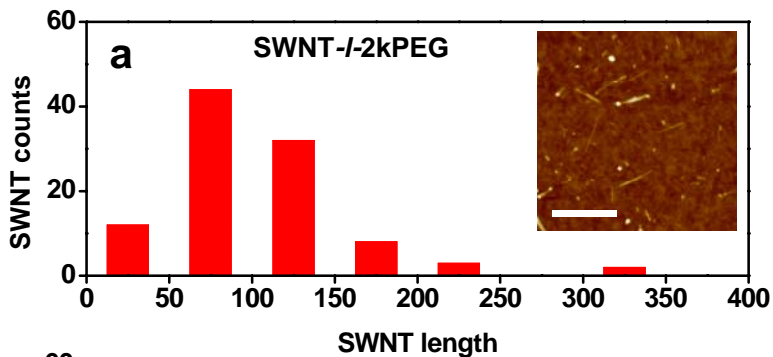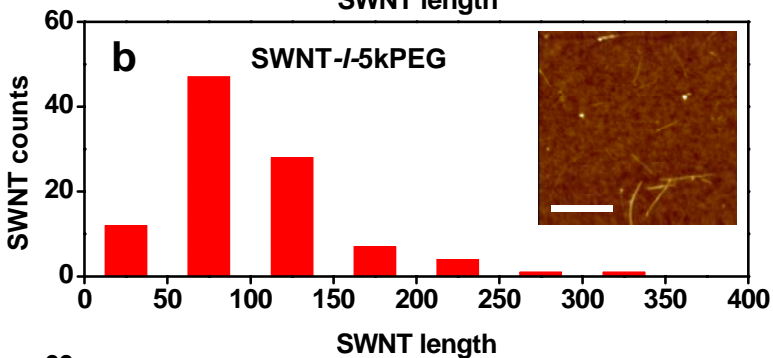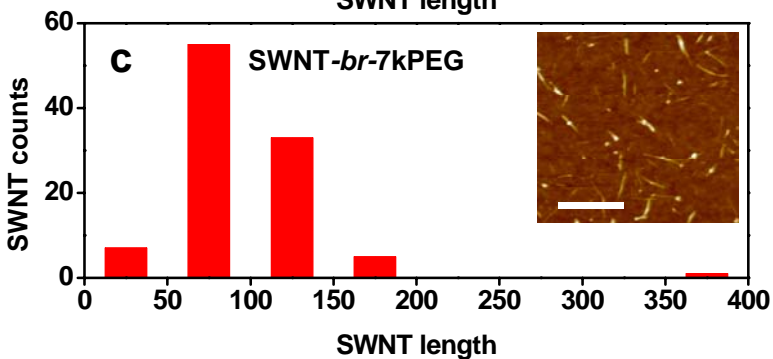

Supplement: pnas_0707654105_1.pdf [file pnas_0707654105_1.pdf]

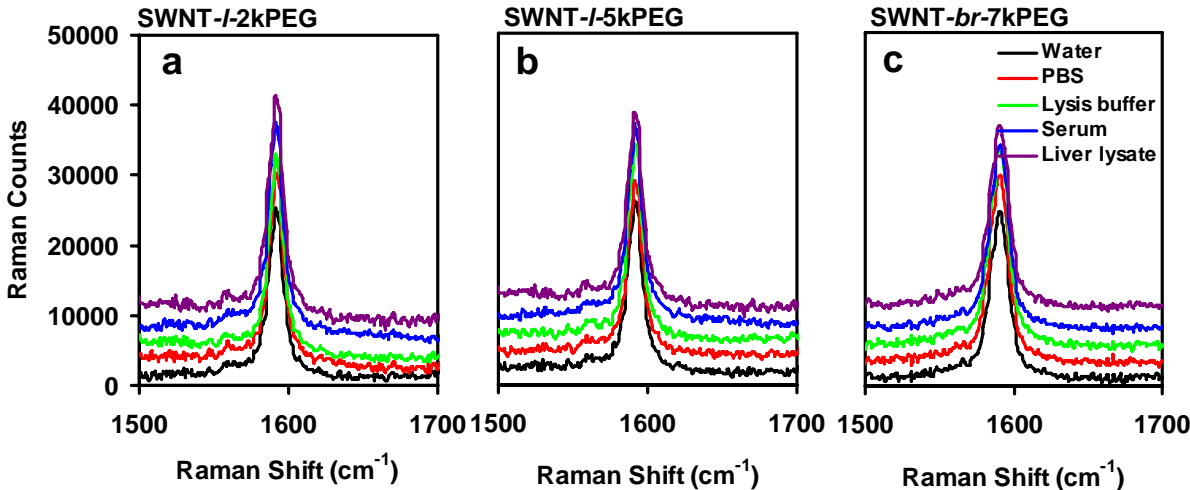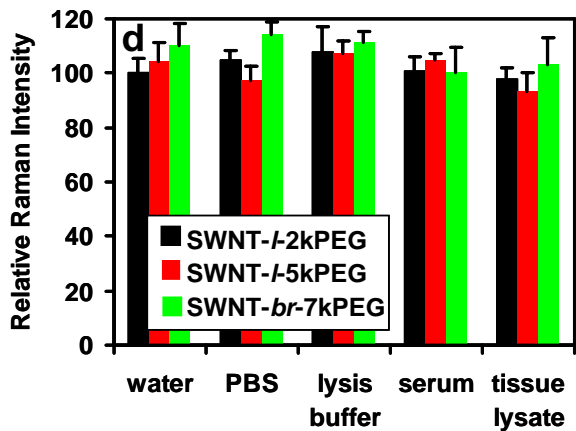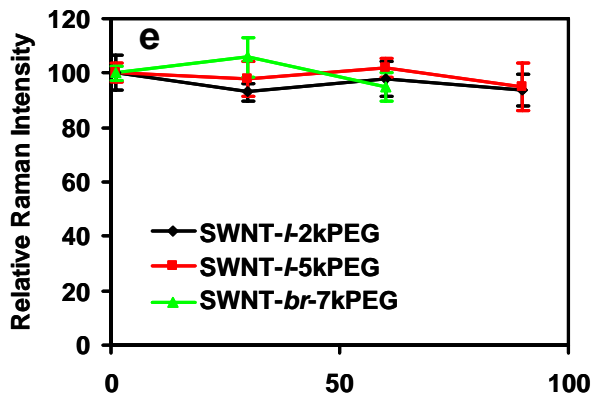

Supplement: pnas_0707654105_2.pdf [file pnas_0707654105_2.pdf]

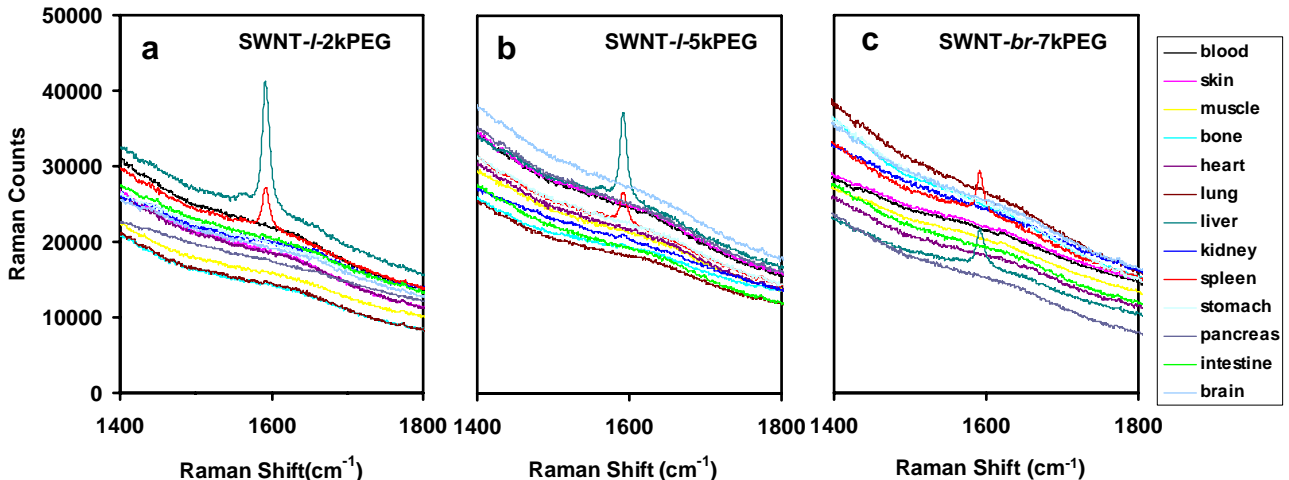

Supplement: pnas_0707654105_3.pdf [file pnas_0707654105_3.pdf]

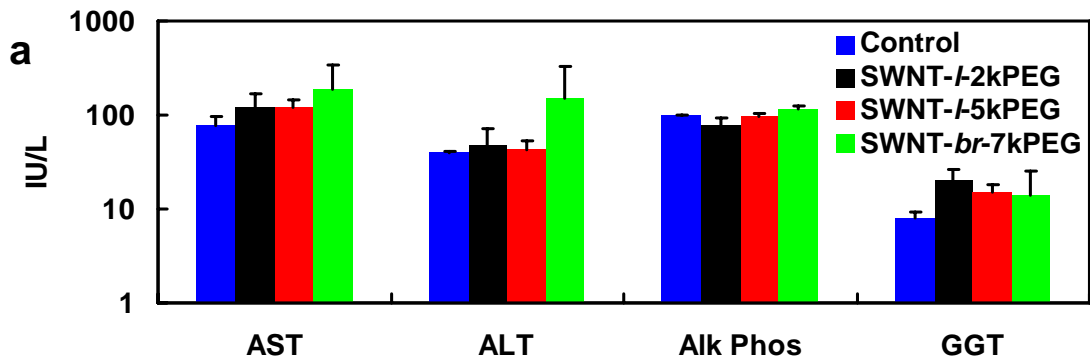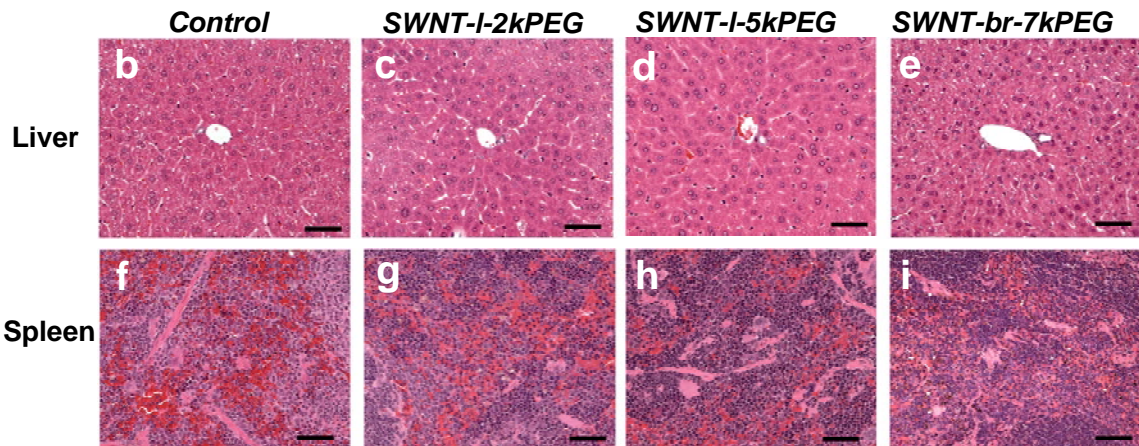

Supplement: pnas_0707654105_4.pdf [file pnas_0707654105_4.pdf]
